# Supplementary material
Source: PubMed Central journal article supplement (PMC2629096)
Supplement: M801697200_1.pdf [file M801697200_1.pdf]

## Supplemental Table 1

### Primary antibodies:

| Protein targeted              | Applications               | Host    | Clone  | Provider                 | Catalogue number |
|-------------------------------|----------------------------|---------|--------|--------------------------|------------------|
| PKD1 (PKD1/2)                 | Western, IHC               | Rabbit  | C-20   | SantaCruz (CA, USA)      | SC-639           |
| PKD1                          | Western                    | Rabbit  | -      | Cell Signaling (MA, USA) | 2052             |
| PKD2                          | Western                    | Rabbit  | -      | Upstate (NY, USA)        | 07-488           |
| PKD2                          | Western                    | Rabbit  | -      | Calbiochem (CA, USA)     | ST1042           |
| PKD3                          | Western, IHC, IC, IP       | Rabbit  | -      | Bethyl (TX, USA)         | A300-319A        |
| Phospho(Ser744/748)-PKD       | Western                    | Rabbit  | -      | Cell Signaling (MA, USA) | 2054             |
| Phospho(Ser916)-PKD           | Western                    | Rabbit  | -      | Cell Signaling (MA, USA) | 2051             |
| ERK1/2                        | Western                    | Rabbit  | -      | Cell Signaling (MA, USA) | 9102             |
| Phospho(Thr202/Tyr204)-ERK1/2 | spho(Thr202/Tyr204)-ERK1/2 | Western | Rabbit | Cell Signaling (MA, USA) | 9101             |
| Phospho(Ser380)-p90RSK        | Western                    | Rabbit  | -      | Cell Signaling (MA, USA) | 9335             |
| VAMP2                         | IC                         | Rabbit  | -      | Abcam (MA, USA)          | Ab3347           |
| GM130                         | IC                         | Mouse   |        | BD Biosciences (CA, USA) | 610822           |
| E-cadherin                    | IC                         | Mouse   | -      | BD Biosciences (CA, USA) | 610181           |
| $\alpha$ -Amylase             | Western                    | Goat    | C-20   | SantaCruz (CA, USA)      | SC-12821         |
| Amylase                       | Western                    | Sheep   | -      | Abcam (MA, USA)          | Ab8944           |
| PDX-1                         | Western                    | Rabbit  | -      | Chemicon Int (USA)       | AB3243           |
| GAPDH                         | Western                    | Goat    | V-18   | SantaCruz (CA, USA)      | SC-20357         |
| $\beta$ -actin                | Western                    | Mouse   | AC-15  | Sigma-Aldrich (MO, USA)  | A5441            |

**IHC:** Immunohistochemistry; **IC:** Immunocytochemistry; **IP:** Immunoprecipitation

### Secondary antibodies:

| Protein targeted                      | Host   | Provider                                          | Catalogue number |
|---------------------------------------|--------|---------------------------------------------------|------------------|
| HRP-conjugated anti-mouse antibodies  | Goat   | Pierce (Illinois, USA)                            | 31430            |
| HRP-conjugated anti-rabbit antibodies | Goat   | Pierce (Illinois, USA)                            | 31460            |
| Alexa Fluor 488 conjugated antibodies | Goat   | Molecular Probes (Invitrogen, Basel, Switzerland) | A-11008          |
| Alexa Fluor 568 conjugated antibodies | Goat   | Molecular Probes (Invitrogen, Basel, Switzerland) | A-11011          |
| Alexa Fluor 594 conjugated antibodies | Goat   | Molecular Probes (Invitrogen, Basel, Switzerland) | A-11005          |
| HRP-conjugated anti-goat antibodies   | Rabbit | Pierce (Illinois, USA)                            | 31402            |

**Other reagents:**

| <b>Name</b>                                                                                                                                                                                             | <b>Provider</b>                   | <b>Catalogue number</b> |
|---------------------------------------------------------------------------------------------------------------------------------------------------------------------------------------------------------|-----------------------------------|-------------------------|
| CCK-8                                                                                                                                                                                                   | Bachem (CA, USA)                  | H-2080                  |
| BBS                                                                                                                                                                                                     | Bachem (CA, USA)                  | H-2155                  |
| NT                                                                                                                                                                                                      | Bachem (CA, USA)                  | H-4435                  |
| Carbachol                                                                                                                                                                                               | Sigma (MO, USA)                   | C2409                   |
| Gastrin I                                                                                                                                                                                               | Bachem (CA, USA)                  | H-3085                  |
| PMA                                                                                                                                                                                                     | Sigma (MO, USA)                   | P-1585                  |
| Collagenase                                                                                                                                                                                             | Sigma (MO, USA)                   | C-1889, C-5138          |
| Soybean trypsin inhibitor                                                                                                                                                                               | Calbiochem (CA, USA)              | 65035                   |
| FuGene HD reagent                                                                                                                                                                                       | Roche (Basel, Switzerland)        | 04 709 705 001          |
| Qiagen RNeasy kit                                                                                                                                                                                       | Qiagen (Basel, CH)                | 74404                   |
| ECL reagent                                                                                                                                                                                             | Amersham (Dübendorf, Switzerland) | RPN2135                 |
| A-sepharose beads                                                                                                                                                                                       | GE Healthcare (Uppsala, Sweden)   | 17-0780-01              |
| G-sepharose beads                                                                                                                                                                                       | GE Healthcare (Uppsala, Sweden)   | 17-0618-01              |
| BAPTA/AM                                                                                                                                                                                                | Sigma (MO, USA)                   | A1076                   |
| A23187                                                                                                                                                                                                  | Alexis Biochemicals               | 450-001-M001            |
| Ionomycin                                                                                                                                                                                               | Calbiochem (CA, USA)              | 407950                  |
| Thapsigargin                                                                                                                                                                                            | Sigma (MO, USA)                   | T9033                   |
| Akt inhibitor                                                                                                                                                                                           | Calbiochem (CA, USA)              | 124005                  |
| LY294002                                                                                                                                                                                                | Calbiochem (CA, USA)              | 440202                  |
| Wortmannin                                                                                                                                                                                              | Sigma (MO, USA)                   | W 1628                  |
| PD98059                                                                                                                                                                                                 | Biomol (USA)                      | EI-360                  |
| U0126                                                                                                                                                                                                   | Calbiochem (CA, USA)              | 662005                  |
| GF109203X                                                                                                                                                                                               | Sigma (MO, USA)                   | G-2911                  |
| Ro31-8220                                                                                                                                                                                               | Calbiochem (CA, USA)              | 557520                  |
| Adeno-X Rapid Titer kit                                                                                                                                                                                 | Clontech (CA, USA)                | 631028                  |
| Laminin I                                                                                                                                                                                               | Trevigen (MD, USA)                | 3400-010-01             |
| Phadebas amylase test                                                                                                                                                                                   | Pharmacia (Uppsala, Sweden)       | 51-1396-173             |
| Krebs-Hensleit buffer (in mM: 142 NaCl, 23.8 NaHCO <sub>3</sub> , 4.83 KCl, 0.96 KH <sub>2</sub> PO <sub>4</sub> , 1.20 MgSO <sub>4</sub> , 12.5 HEPES, 5 glucose, and 2.2 CaCl <sub>2</sub> , pH 7.4). | Sigma (MO, USA)                   | K-3753                  |

**Supplemental Table 2**

| Gene          | Primer sequence (5'→ 3') for conventional PCR                         | Accession Number |
|---------------|-----------------------------------------------------------------------|------------------|
| Mouse<br>PKD1 | S: CTC CAA TGT GTC CCT CAC TGG A<br>AS: GGT CTG CAT CTG GAT CTT GCA T | NM_008857        |
| Mouse<br>PKD2 | S: GCT CTC ACT GTG CAC TCG TAC C<br>AS: TGA CAC CAG AAT CCT CCA ACT C | NM_178900        |
| Mouse<br>PKD3 | S: ATC TGG CTA CCA GTA TCT CCG<br>AS: CCG ACC ACA TGT CTA GAG AAC G   | NM_029239        |

| Gene             | Primer set 1 sequence (5'→ 3') for real-time PCR                          | Accession Number |
|------------------|---------------------------------------------------------------------------|------------------|
| Mouse<br>RatPKD1 | S: GCT TTG CGA CAT CTT CAT TTT AAA<br>AS: CAA AAC CAA AAT CAC AGA GCT TCA | NM_008857        |
| Mouse<br>PKD2    | S: CTA CAG CGT GGA CAA GTC TCT CA<br>AS: CCT CTA GCT CTC GGA GGT CAA G    | NM_178900        |
| Mouse<br>PKD3    | S: CGA AAA TGT GCT GCT GCT TGC A<br>AS: GCG GGC AAA CCC AAA GT            | NM_029239        |

| Gene          | Primer set 2 published sequence from Applied Bioscience, Inc. (5'→ 3') for real-time PCR | Assay ID      |
|---------------|------------------------------------------------------------------------------------------|---------------|
| Mouse<br>PKD1 | S: AGATTCAGGAAAATGTGGATATCAG                                                             | Mm00435790_m1 |
| Mouse<br>PKD2 | S: CATCTGGAGCCATCGACCTCATCAA                                                             | Mm00626821_m1 |
| Mouse<br>PKD3 | S: ATCAGAAGTTTCCAGAGTGTGGATT                                                             | Mm00551422_m1 |

| Gene        | Primer published sequence from Applied Bioscience, Inc. (5'→ 3') for real-time PCR | Accession Number/<br>Assay ID    |
|-------------|------------------------------------------------------------------------------------|----------------------------------|
| Rat<br>PKD1 | S: ATCTGGAGCCATCGACCTCATCAAC                                                       | NM_001013895.1/<br>Rn00626821_m1 |
| Rat<br>PKD2 | S: CTTTCAATGGAGAGCCTTCCAGTGT                                                       | XM_001054495.1/<br>Rn01469586_m1 |
| Rat<br>PKD3 | S: ACCCCTGGCTACAGGACTACCAGAC                                                       | XM_234108.4/<br>Rn01469119_m1    |

## SUPPLEMENTAL FIGURE LEGENDS

**Supplemental Fig 1. Expression pattern of PKD isoform in the rat pancreas.** (A) Quantitative RT-PCR analysis of Sprague Dawley male rat pancreas using primers targeting PKD1-3 genes. Results represent the means  $\pm$  SE for triplicate assays. (B) Western blot analysis of PKD protein expression in rat whole pancreas and acini. Homogenized and sonicated whole rat pancreas and isolated acini were probed with anti-PKD antibodies on parallel blots. Anti-amylase and  $\beta$ -actin antibodies were used as loading controls. Similar expression patterns were observed in three separate animals.

**Supplemental Fig 2. Localization of endogenous PKD3 in pancreatic acinar cells.** Isolated mouse pancreatic acini were incubated with control media or media containing CCK (10 nM) for 5 min and then immunostained using antibodies against (A) PKD3 and VAMP2 or (B) PKD3 and GM130. Co-localization was qualitatively determined by overlap of green (PKD3) and red (VAMP2 or GM130) fluorescence. *Arrows*, translocation of PKD3 positive-staining
