# Supplementary material
Source: PubMed Central journal article supplement (PMC2629096)

# Chen et al, Supplemental Figure 1

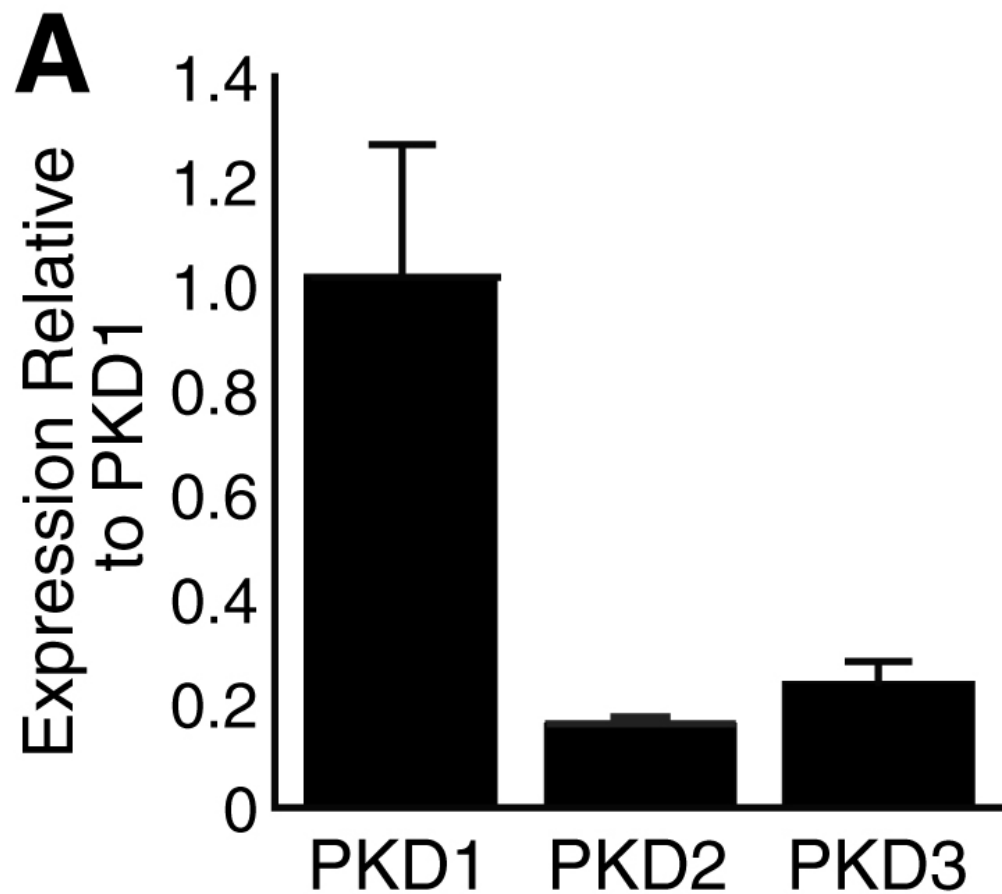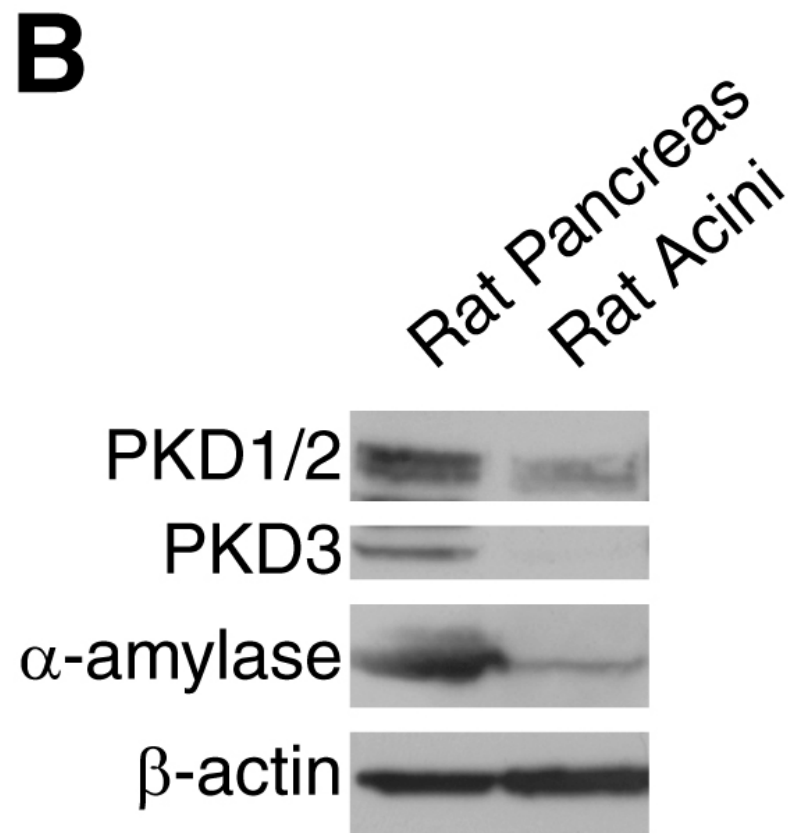

**A**

**Control**

**CCK (10 nM)**

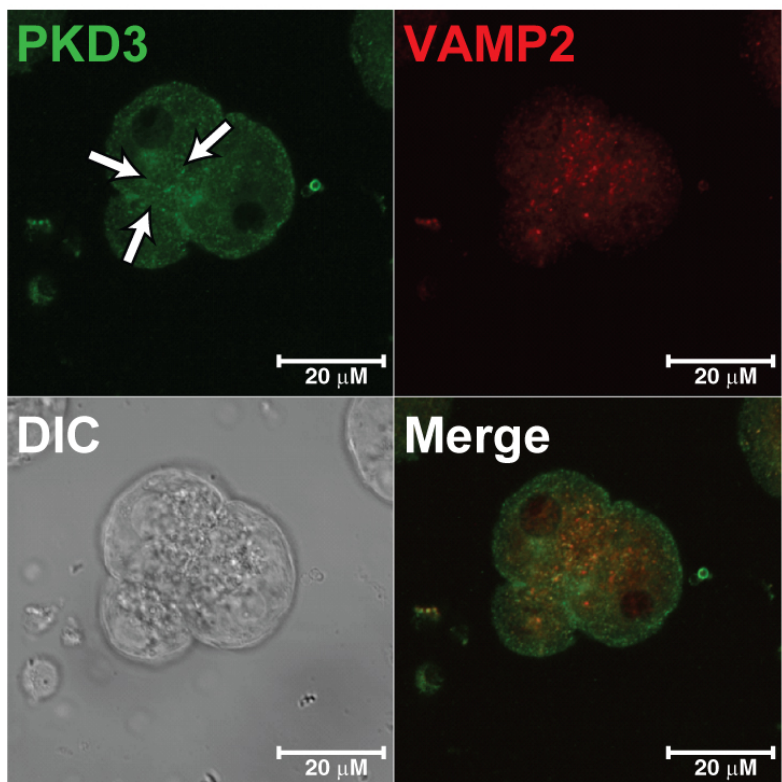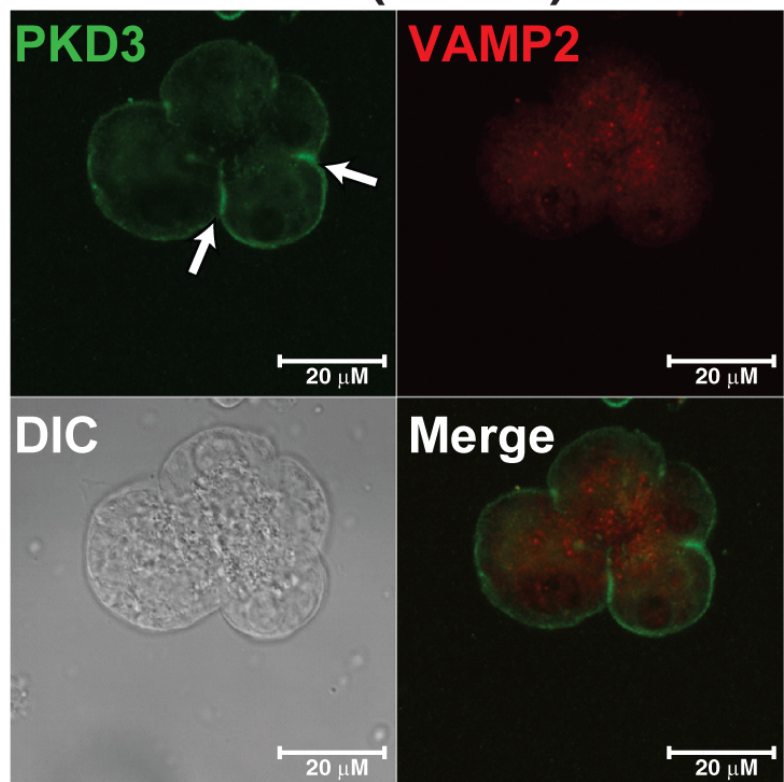

**B**

**Control**

**CCK (10 nM)**

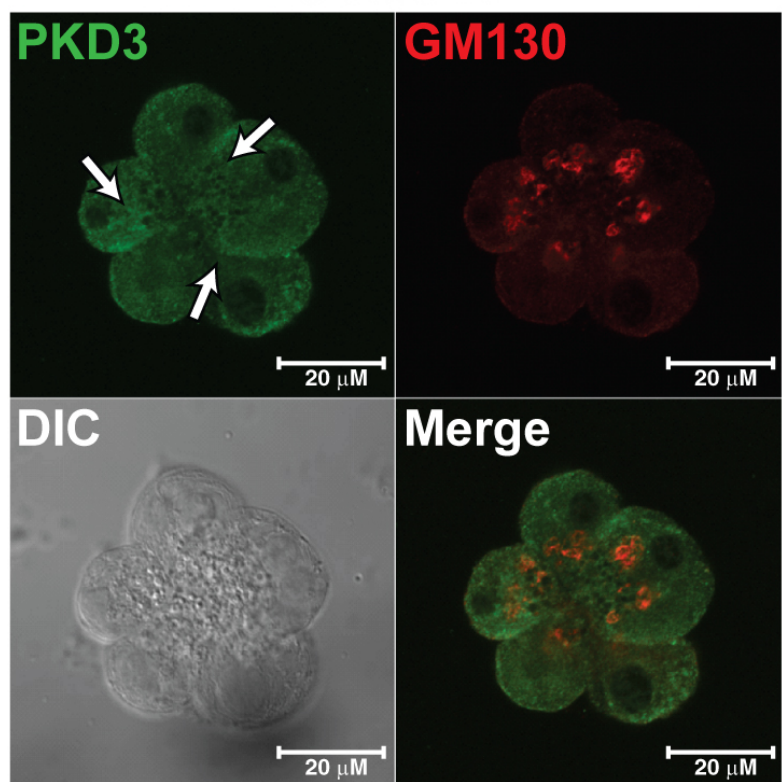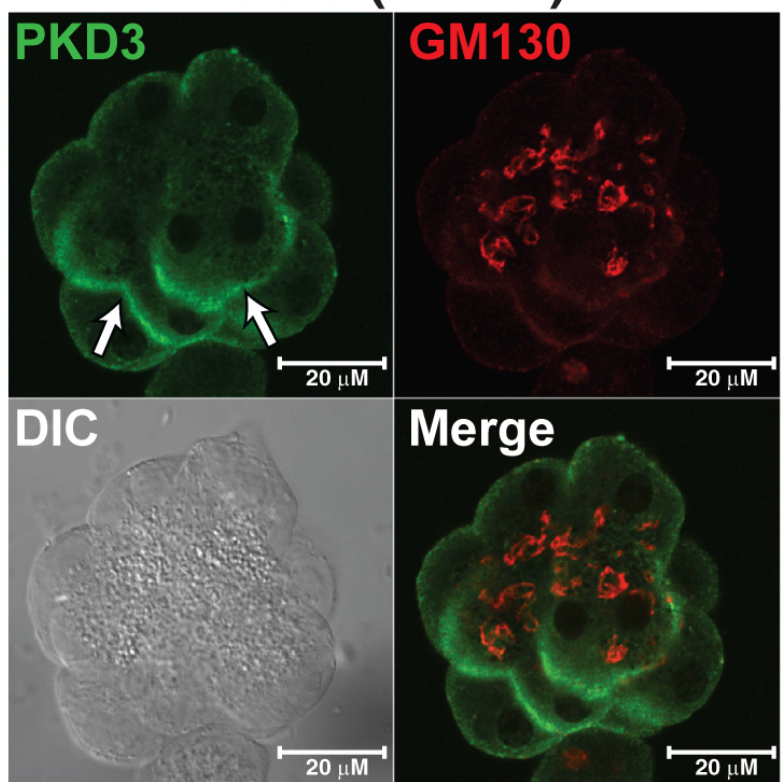

Supplement: M801697200_2.pdf [file M801697200_2.pdf]
